# Supplementary material
Source: Royal Society of Chemistry journal article supplement (doi:10.1039/d6ja00114a)
Supplement: d6ja00114a1.xlsx [file d6ja00114a1.xlsx]

## Sheet: Introduction
Supplementary material. Static, multi-static, dynamic, multi-dynamic Nd isotope ratios obtained with the classic and extended 4-line acquisition method of Garçon et al. (2018) for JNdi1 material reference on TIMS during this study.
As well as Supplementary figures cited in text
Effects of Domain Mixing on High-Precision 142Nd/144Nd Measurements Using Thermal-Ionization Mass Spectrometry
T. ROUYERa,*, R. DOUCELANCEa, M. BOYETa, M. GARÇONa, D. AUCLAIRa
a Laboratoire Magmas et Volcans, Université Clermont Auvergne, CNRS, IRD, OPGC, F-63000 Clermont-Ferrand, France
* Corresponding author
E-mail adress: thomas.rouyer@uca.fr

## Sheet: Supplementary figure 1
									Supplementary Figure 1: Dynamic (a) 143Nd/144Nd, (b) 145Nd/144Nd, (c) 148Nd/144Nd and (d) 150Nd/144Nd isotope ratios for JNdi-1 standard runs with 540, 1080, and 1620 cycles plotted as a function of the measurement session.
									Filled diamond symbols represent 540-cycle runs, filled circle symbols denote 1080-cycles runs, and the four circled in red runs in session 8 were conducted with 1620 cycles. Errors bars indicate ±2s.e. internal precision.

## Sheet: Supplementary figure 2
										Supplementary Figure 2: Dynamic 142Nd/144Nd plotted against (a) dynamic 143Nd/144Nd, (b) dynamic 145Nd/144Nd, (c) dynamic 148Nd/144Nd, and (d) dynamic 150Nd/144Nd (e) measured 146Nd/144Nd for JNdi-1 standard runs with 540, 1080, and 1620 cycles.
										Errors bars represent 2s.e. internal precision. 540 cycles measurements are represented as diamonds while extended (1080 and 1620 cycles measurements) are represented as circled points. Colors correspond to session analyses and are described in panel (a).

## Sheet: Supplementary figure 3
	Supplementary figure 3: Scanning Electron Microscope (SEM) imaging of 1000-ng (a, b, c, d) and 750-ng (e, f, g,h) Nd loads using Back Scattered Electrons (BSE) and corresponding Nd concentration maps obtained by Energy Dispersive Spectroscopy (EDS),
	showing the load immediately after deposition (prior to introduction into the TIMS) for multiple filaments. HV of the SEM was set at 15 kV.

## Sheet: Dynamic JNdi1 Extended runs
Multi-dynamic and dynamic Nd isotope ratios for JNdi1 extended runs
														Multi-dynamic											Dynamic 1											Dynamic 2									Dynamic 3
Session	Name	Number of cycles	Mean 142Nd signal intensity (V)	Mean fractionation rate (ppm/s)	146Nd/144Nd	2SE	140Ce/146Nd	2SE	147Sm/144Nd	2SE	141Pr/144Nd	2SE		142Nd/144Nd	2SE	143Nd/144Nd	2SE	145Nd/144Nd	2SE	148Nd/144Nd	2SE	150Nd/144Nd	2SE		142Nd/144Nd	2SE	143Nd/144Nd	2SE	145Nd/144Nd	2SE	148Nd/144Nd	2SE	150Nd/144Nd	2SE		142Nd/144Nd	2SE	143Nd/144Nd	2SE	145Nd/144Nd	2SE	148Nd/144Nd	2SE		145Nd/144Nd	2SE
1	F2 JNdi1	1080	7.5	0.091	0.721915	8.92888e-05	3.40664e-06	1.45495e-07	1.26879e-06	8.66073e-07	4.32563e-05	1.33443e-06		1.14183	1.10896e-06	0.5121	3.60914e-07	0.348403	2.19665e-07	0.241578	4.21172e-07	0.236451	1.85665e-06		1.14183	1.59926e-06	0.512097	4.7139e-07	0.348402	3.71548e-07	0.241579	6.23435e-07	0.236451	1.85665e-06		1.14183	1.53177e-06	0.512102	5.02954e-07	0.348404	3.8437e-07	0.241577	5.5818e-07		0.348405	3.61682e-07
1	F4 JNdi1	1080	7.75	0.054	0.721705	4.61259e-05	5.28358e-06	2.98068e-07	8.68212e-07	1.56296e-07	4.8607e-05	1.4514e-06		1.14183	1.09262e-06	0.5121	3.34669e-07	0.348403	2.11423e-07	0.241578	3.97527e-07	0.23645	9.82693e-07		1.14183	1.56092e-06	0.512097	4.53814e-07	0.348402	3.69748e-07	0.241578	5.56257e-07	0.23645	9.82693e-07		1.14183	1.52287e-06	0.512102	4.38961e-07	0.348404	3.50517e-07	0.241578	5.68363e-07		0.348405	3.44111e-07
1	F5 JNdi1	1080	4.46	0.098	0.72281	7.12057e-05	3.78355e-06	2.13227e-07	8.87062e-07	2.32667e-07	3.45466e-05	7.35246e-07		1.14183	1.48338e-06	0.5121	4.50962e-07	0.348403	2.89188e-07	0.241579	5.22411e-07	0.23645	1.32232e-06		1.14183	2.09901e-06	0.512097	6.1952e-07	0.348401	5.07872e-07	0.241578	7.51489e-07	0.23645	1.32232e-06		1.14183	2.09453e-06	0.512102	6.10172e-07	0.348403	5.04144e-07	0.241579	7.24909e-07		0.348405	4.62684e-07
1	F7 JNdi1	1050	7.19	0.05	0.721641	4.81889e-05	3.28079e-06	1.16481e-07	1.39246e-06	1.21236e-06	3.95228e-05	5.80642e-07		1.14183	1.15172e-06	0.512099	3.68556e-07	0.348403	2.33469e-07	0.241579	4.54916e-07	0.236449	2.23757e-06		1.14183	1.66335e-06	0.512097	4.67889e-07	0.348402	3.69559e-07	0.241578	6.3391e-07	0.236449	2.23757e-06		1.14183	1.59276e-06	0.512101	5.39365e-07	0.348403	3.94355e-07	0.241579	6.51419e-07		0.348405	4.17518e-07
1	F8 JNdi1	1050	7.4	0.073	0.721354	6.26857e-05	4.12657e-06	1.5156e-07	2.00381e-06	2.9279e-06	4.75883e-05	1.03356e-06		1.14183	1.18491e-06	0.5121	3.69392e-07	0.348403	2.42449e-07	0.241578	4.57011e-07	0.236451	4.46241e-06		1.14183	1.66262e-06	0.512097	4.72636e-07	0.348401	4.05691e-07	0.241579	6.88468e-07	0.236451	4.46241e-06		1.14184	1.66397e-06	0.512103	5.17716e-07	0.348403	4.14733e-07	0.241577	5.92464e-07		0.348404	4.09807e-07
2	F18 JNdi1	1050	7.01	0.049	0.721602	4.36212e-05	2.81416e-06	1.35126e-07	5.53185e-07	1.47545e-07	3.95155e-05	5.65454e-07		1.14183	1.20266e-06	0.512099	3.51832e-07	0.348403	2.20279e-07	0.241577	4.05891e-07	0.236449	1.19726e-06		1.14183	1.71391e-06	0.512096	4.69192e-07	0.348401	3.66001e-07	0.241578	5.89703e-07	0.236449	1.19726e-06		1.14183	1.67139e-06	0.512102	4.68565e-07	0.348403	3.65302e-07	0.241577	5.56825e-07		0.348405	3.77818e-07
2	F19 JNdi1	780	6.01	0.061	0.721998	5.21751e-05	2.988e-06	2.00549e-07	9.56685e-07	1.82663e-07	3.92234e-05	5.78717e-07		1.14183	1.48705e-06	0.512099	4.98671e-07	0.348403	2.99727e-07	0.241579	5.31929e-07	0.236451	1.29668e-06		1.14183	1.95604e-06	0.512096	6.79979e-07	0.348401	5.21563e-07	0.241579	7.4361e-07	0.236451	1.29668e-06		1.14184	2.22028e-06	0.512102	6.68154e-07	0.348403	5.28667e-07	0.241579	7.60915e-07		0.348404	4.77455e-07
2	F1 JNdi1	1080	6.3	0.073	0.721805	6.80074e-05	4.71896e-06	2.2424e-07	1.1547e-06	1.44326e-06	4.60025e-05	1.28039e-06		1.14183	1.32358e-06	0.512099	4.2513e-07	0.348403	2.60784e-07	0.241578	4.84751e-07	0.23645	2.72215e-06		1.14183	1.81011e-06	0.512096	5.7913e-07	0.348402	4.29757e-07	0.241579	6.83929e-07	0.23645	2.72215e-06		1.14183	1.91132e-06	0.512102	5.75443e-07	0.348403	4.40279e-07	0.241578	6.87012e-07		0.348405	4.60311e-07
2	F3 JNdi1	1080	6.18	0.056	0.721004	4.77626e-05	2.98549e-06	1.49847e-07	4.47504e-07	1.61195e-07	4.96646e-05	8.59653e-07		1.14183	1.23103e-06	0.512098	3.68907e-07	0.348403	2.35302e-07	0.241577	4.42823e-07	0.236448	1.10661e-06		1.14182	1.72329e-06	0.512096	4.82833e-07	0.348402	3.94937e-07	0.241577	6.34371e-07	0.236448	1.10661e-06		1.14183	1.74374e-06	0.512101	5.21452e-07	0.348403	3.83383e-07	0.241577	6.18169e-07		0.348405	4.24024e-07
3	F1 JNdi1	1080	7	0.052	0.722432	4.4261e-05	1.85529e-06	1.39145e-07	8.95062e-07	1.52916e-07	3.25981e-05	4.3684e-07		1.14183	1.17933e-06	0.512099	3.53627e-07	0.348403	2.26291e-07	0.241579	4.41184e-07	0.236452	1.04917e-06		1.14183	1.69264e-06	0.512097	4.62254e-07	0.348401	3.73125e-07	0.241578	6.10731e-07	0.236452	1.04917e-06		1.14184	1.62299e-06	0.512102	4.79482e-07	0.348403	3.77134e-07	0.241579	6.36623e-07		0.348404	3.89604e-07
3	F2 JNdi1	1080	5.89	0.09	0.721617	8.01499e-05	4.0046e-06	1.57295e-07	5.52601e-07	1.75669e-07	4.39695e-05	1.15882e-06		1.14182	1.26441e-06	0.512098	3.80458e-07	0.348403	2.45899e-07	0.241577	4.63876e-07	0.236447	1.16123e-06		1.14182	1.74561e-06	0.512095	5.23648e-07	0.348401	4.23171e-07	0.241577	6.72595e-07	0.236447	1.16123e-06		1.14183	1.80312e-06	0.5121	5.14243e-07	0.348403	4.128e-07	0.241577	6.39253e-07		0.348405	4.04122e-07
3	F5 JNdi1	1080	5.91	0.087	0.72231	8.0442e-05	3.82316e-06	1.52631e-07	1.15708e-06	1.61646e-07	3.66074e-05	8.11066e-07		1.14184	1.23618e-06	0.5121	3.82961e-07	0.348402	2.44276e-07	0.241579	4.58407e-07	0.236452	1.12454e-06		1.14184	1.77301e-06	0.512098	5.26971e-07	0.3484	4.03735e-07	0.241578	6.49154e-07	0.236452	1.12454e-06		1.14184	1.72303e-06	0.512102	5.23827e-07	0.348402	4.29695e-07	0.24158	6.4402e-07		0.348405	3.89282e-07
3	F6 JNdi1	1080	6.05	0.048	0.720581	4.11747e-05	3.36871e-06	1.44487e-07	2.44939e-07	1.51411e-07	5.13921e-05	8.75081e-07		1.14183	1.27296e-06	0.512098	3.77398e-07	0.348403	2.363e-07	0.241577	4.52422e-07	0.23645	1.15487e-06		1.14183	1.82269e-06	0.512096	5.17333e-07	0.348401	3.98252e-07	0.241577	6.54485e-07	0.23645	1.15487e-06		1.14183	1.77586e-06	0.512101	5.05295e-07	0.348403	3.81474e-07	0.241578	6.25065e-07		0.348405	4.12682e-07
3	F8 JNdi1	1080	4.83	0.085	0.721807	7.77772e-05	1.4221e-05	7.78017e-07	6.96534e-05	1.12527e-06	3.88357e-05	1.21371e-06		1.14183	1.4114e-06	0.512099	4.27693e-07	0.348403	2.75259e-07	0.241578	5.43914e-07	0.236447	1.27318e-06		1.14183	1.99728e-06	0.512096	5.97697e-07	0.348401	4.47921e-07	0.241577	7.44083e-07	0.236447	1.27318e-06		1.14183	1.98726e-06	0.512102	5.61372e-07	0.348403	4.63251e-07	0.241578	7.89324e-07		0.348404	4.97903e-07
4	F5 JNdi1	960	4.84	0.093	0.723214	7.92872e-05	3.64902e-06	2.08186e-07	1.33988e-06	2.29379e-07	2.97655e-05	6.53893e-07		1.14183	1.48004e-06	0.512098	4.36427e-07	0.348403	2.79429e-07	0.24158	5.39554e-07	0.236453	1.35034e-06		1.14183	2.08189e-06	0.512096	5.96957e-07	0.348401	4.60799e-07	0.24158	7.368e-07	0.236453	1.35034e-06		1.14183	2.08144e-06	0.512101	5.77966e-07	0.348403	4.67175e-07	0.241579	7.8846e-07		0.348405	4.80862e-07
4	F6 JNdi1	1080	4.83	0.073	0.721777	6.35122e-05	4.1211e-06	1.96743e-07	6.44614e-07	1.79462e-07	4.21119e-05	1.0147e-06		1.14183	1.3753e-06	0.512099	4.04996e-07	0.348403	2.69179e-07	0.241578	5.19426e-07	0.23645	1.25851e-06		1.14183	1.97009e-06	0.512096	5.59287e-07	0.348401	4.58534e-07	0.241578	7.38827e-07	0.23645	1.25851e-06		1.14183	1.9182e-06	0.512101	5.51859e-07	0.348403	4.52246e-07	0.241578	7.30615e-07		0.348405	4.57475e-07
4	F8 JNdi1	1080	1.42	0.091	0.722577	8.41003e-05	3.1505e-06	2.21946e-07	8.15477e-07	2.51813e-07	2.635e-05	6.15319e-07		1.14183	1.55483e-06	0.512098	4.69742e-07	0.348403	2.94486e-07	0.241577	5.55955e-07	0.236448	1.37341e-06		1.14182	2.23111e-06	0.512095	6.37323e-07	0.348401	5.02285e-07	0.241578	7.91172e-07	0.236448	1.37341e-06		1.14183	2.15822e-06	0.512101	6.3494e-07	0.348402	5.00168e-07	0.241577	7.81037e-07		0.348405	4.96682e-07
5	F3 JNdi1	1050	7.77	0.125	0.72209	0.000123792	2.64138e-06	1.19768e-07	7.60841e-08	1.34014e-07	3.65876e-05	1.32958e-06		1.14182	1.12712e-06	0.512096	3.36964e-07	0.348403	2.15862e-07	0.241577	3.95768e-07	0.236444	1.00361e-06		1.14182	1.61592e-06	0.512094	4.4502e-07	0.348401	3.72522e-07	0.241577	5.69724e-07	0.236444	1.00361e-06		1.14182	1.57204e-06	0.512099	4.55086e-07	0.348403	3.50207e-07	0.241576	5.49098e-07		0.348405	3.68352e-07
5	F5 JNdi1	1020	5.07	0.119	0.722117	0.000110077	3.97194e-06	2.0938e-07	3.72706e-07	1.73776e-07	3.97349e-05	1.31165e-06		1.14182	1.38244e-06	0.512097	4.18408e-07	0.348403	2.62298e-07	0.241577	5.08158e-07	0.236446	1.22072e-06		1.14182	1.9393e-06	0.512095	5.578e-07	0.348401	4.27567e-07	0.241578	7.28597e-07	0.236446	1.22072e-06		1.14182	1.97151e-06	0.512099	5.81856e-07	0.348403	4.44328e-07	0.241577	7.07791e-07		0.348405	4.49408e-07
5	F7 JNdi1	1080	4.25	0.077	0.721419	6.17704e-05	2.68159e-06	2.07755e-07	-2.11425e-07	2.05817e-07	4.39361e-05	8.94747e-07		1.14182	1.51405e-06	0.512097	4.47623e-07	0.348402	2.81303e-07	0.241577	5.49616e-07	0.236447	1.32793e-06		1.14182	2.1334e-06	0.512094	6.02861e-07	0.348401	4.80409e-07	0.241577	7.95589e-07	0.236447	1.32793e-06		1.14182	2.14584e-06	0.512099	6.24744e-07	0.348402	4.73689e-07	0.241576	7.58037e-07		0.348404	4.83512e-07
5	F8 JNdi1	840	4.52	0.094	0.722072	9.45474e-05	3.04572e-06	2.2656e-07	1.30713e-07	2.21462e-07	0	0		1.14183	1.65984e-06	0.512098	4.87519e-07	0.348403	3.10974e-07	0.241577	5.73983e-07	0.236447	1.44556e-06		1.14183	2.2535e-06	0.512095	6.75519e-07	0.348402	5.29235e-07	0.241577	8.13599e-07	0.236447	1.44556e-06		1.14182	2.43562e-06	0.5121	6.6769e-07	0.348403	5.41099e-07	0.241577	8.10116e-07		0.348405	5.23609e-07
6	F1 JNdi1	960	5.95	0.141	0.722352	0.000126341	4.98133e-06	2.01007e-07	8.4842e-07	2.01325e-07	3.70647e-05	1.47029e-06		1.14182	1.32396e-06	0.512097	4.12927e-07	0.348403	2.53125e-07	0.241577	4.94765e-07	0.236447	1.23848e-06		1.14182	1.8552e-06	0.512095	5.58829e-07	0.348401	4.21734e-07	0.241577	6.82435e-07	0.236447	1.23848e-06		1.14182	1.87852e-06	0.5121	5.71991e-07	0.348403	4.39896e-07	0.241576	7.14942e-07		0.348405	4.13851e-07
6	F2 JNdi1	1080	5.03	0.088	0.721717	7.51533e-05	2.93615e-06	1.83283e-07	3.4877e-07	1.81463e-07	4.0243e-05	1.19185e-06		1.14182	1.32865e-06	0.512097	3.90602e-07	0.348403	2.62392e-07	0.241577	5.04423e-07	0.236447	1.20306e-06		1.14182	1.83324e-06	0.512095	5.56329e-07	0.348401	4.45825e-07	0.241577	7.21891e-07	0.236447	1.20306e-06		1.14183	1.91737e-06	0.512099	5.16423e-07	0.348403	4.26919e-07	0.241577	7.05157e-07		0.348405	4.56454e-07
6	F3 JNdi1	1080	4.32	0.066	0.722172	6.14318e-05	4.58627e-06	2.30462e-07	8.60422e-07	2.34731e-07	3.95189e-05	8.89336e-07		1.14183	1.44666e-06	0.512099	4.25648e-07	0.348403	2.84635e-07	0.241578	5.51733e-07	0.236451	1.31491e-06		1.14183	1.98251e-06	0.512097	6.03772e-07	0.348401	4.77459e-07	0.241578	7.89206e-07	0.236451	1.31491e-06		1.14183	2.10694e-06	0.512101	5.68221e-07	0.348403	4.82098e-07	0.241578	7.71193e-07		0.348404	5.0024e-07
6	F4 JNdi1	1080	4.53	0.048	0.722604	4.109e-05	4.32845e-06	2.05306e-07	9.19487e-07	2.19974e-07	3.08815e-05	3.85113e-07		1.14183	1.46888e-06	0.512098	4.41817e-07	0.348403	2.79941e-07	0.241579	5.34666e-07	0.236452	1.30473e-06		1.14183	2.15231e-06	0.512096	6.05598e-07	0.348402	4.74798e-07	0.24158	7.40732e-07	0.236452	1.30473e-06		1.14183	1.99479e-06	0.512101	6.04719e-07	0.348403	4.86871e-07	0.241579	7.68382e-07		0.348405	4.74923e-07
6	F9 JNdi1	1080	5.71	0.084	0.722553	7.62114e-05	3.2065e-06	1.58792e-07	5.11238e-07	1.63788e-07	3.62898e-05	8.26675e-07		1.14183	1.29389e-06	0.512098	3.852e-07	0.348403	2.47454e-07	0.241578	4.54179e-07	0.236449	1.12996e-06		1.14183	1.77588e-06	0.512096	5.21609e-07	0.348401	4.12524e-07	0.241578	6.36578e-07	0.236449	1.12996e-06		1.14183	1.87923e-06	0.512101	5.26368e-07	0.348402	4.25777e-07	0.241578	6.48344e-07		0.348404	4.22621e-07
7	F3 JNdi1	1080	4.71	0.089	0.723167	7.77402e-05	6.00996e-06	2.6484e-07	1.39892e-06	2.24786e-07	3.18496e-05	6.50884e-07		1.14183	1.49869e-06	0.5121	4.4875e-07	0.348403	2.78348e-07	0.241578	5.3447e-07	0.236452	1.37911e-06		1.14183	2.13027e-06	0.512097	5.96219e-07	0.348401	4.84164e-07	0.241579	7.58688e-07	0.236452	1.37911e-06		1.14183	2.09967e-06	0.512102	6.25726e-07	0.348403	4.61716e-07	0.241578	7.5279e-07		0.348404	4.78699e-07
8	F1 JNdi1	1080	4.74	0.08	0.722701	7.32704e-05	4.48646e-06	1.9672e-07	9.25426e-07	1.79804e-07	3.59656e-05	7.31755e-07		1.14183	1.42749e-06	0.512098	4.14084e-07	0.348403	2.61173e-07	0.241578	5.09525e-07	0.23645	1.26596e-06		1.14183	2.12782e-06	0.512096	5.82478e-07	0.348401	4.58055e-07	0.241578	7.14464e-07	0.23645	1.26596e-06		1.14183	1.90432e-06	0.512101	5.53568e-07	0.348403	4.42554e-07	0.241577	7.24733e-07		0.348404	4.40547e-07
8	F2 JNdi1	1500	8.72	0.069	0.723217	0.000109274	3.88373e-06	1.04186e-07	1.28413e-06	1.07264e-07	2.72978e-05	8.00428e-07		1.14183	1.04625e-06	0.512099	3.23956e-07	0.348403	2.32548e-07	0.241578	3.89579e-07	0.236452	1.37454e-06		1.14183	1.46118e-06	0.512097	4.73492e-07	0.3484	4.87395e-07	0.241579	5.26953e-07	0.236452	1.37454e-06		1.14183	1.49752e-06	0.512101	4.17466e-07	0.348403	3.23134e-07	0.241578	5.71441e-07		0.348405	3.38825e-07
8	F3 JNdi1	1620	5.93	0.048	0.72282	5.76638e-05	4.77711e-06	1.62573e-07	1.27379e-06	1.30392e-07	3.51371e-05	6.18085e-07		1.14183	1.06659e-06	0.512099	3.15056e-07	0.348403	2.0202e-07	0.241578	3.99812e-07	0.23645	9.0526e-07		1.14183	1.44624e-06	0.512097	4.28226e-07	0.348401	3.2891e-07	0.241578	5.27178e-07	0.23645	9.0526e-07		1.14183	1.5639e-06	0.512101	4.40988e-07	0.348402	3.26858e-07	0.241578	5.97947e-07		0.348404	3.715e-07
8	F4 JNdi1	1620	6.26	0.081	0.723365	0.000105251	2.78017e-06	1.55252e-07	1.10165e-06	1.65691e-07	2.99259e-05	8.54135e-07		1.14183	1.05059e-06	0.512097	3.02701e-07	0.348403	2.00194e-07	0.241578	3.74529e-07	0.236449	9.46392e-07		1.14183	1.50027e-06	0.512095	4.21157e-07	0.348401	3.36114e-07	0.241578	5.13641e-07	0.236449	9.46392e-07		1.14182	1.4695e-06	0.512099	4.09974e-07	0.348402	3.4252e-07	0.241578	5.44805e-07		0.348404	3.39994e-07
8	F5 JNdi1	1620	5.14	0.052	0.723112	6.35997e-05	3.53079e-06	1.8152e-07	1.41432e-06	1.78419e-07	3.15405e-05	5.53711e-07		1.14183	1.15524e-06	0.512099	3.34522e-07	0.348403	2.23881e-07	0.241579	4.56479e-07	0.236454	1.08565e-06		1.14183	1.65319e-06	0.512097	4.56985e-07	0.348401	3.76571e-07	0.24158	6.06225e-07	0.236454	1.08565e-06		1.14183	1.61464e-06	0.512101	4.63883e-07	0.348402	3.74183e-07	0.241579	6.78776e-07		0.348405	3.87639e-07
8	F6 JNdi1	690	6.32	0.147	0.722728	0.000148809	2.90411e-06	1.92651e-07	7.35143e-07	1.79347e-07	3.6595e-05	1.64751e-06		1.14182	1.50732e-06	0.512097	4.6484e-07	0.348402	2.94211e-07	0.241576	5.68978e-07	0.236447	1.2933e-06		1.14182	2.15566e-06	0.512094	6.03676e-07	0.348401	5.0904e-07	0.241577	7.85546e-07	0.236447	1.2933e-06		1.14183	2.08878e-06	0.5121	6.36356e-07	0.348402	4.9918e-07	0.241576	8.19663e-07		0.348404	4.88705e-07
8	F7 JNdi1	930	3.46	0.079	0.723077	7.26921e-05	6.53465e-06	1.16194e-06	9.56668e-07	2.7784e-07	3.47631e-05	7.74218e-07		1.14184	1.86373e-06	0.512099	5.45096e-07	0.348403	3.62432e-07	0.241579	6.95801e-07	0.236453	1.6283e-06		1.14183	2.57026e-06	0.512097	7.52928e-07	0.348401	5.88622e-07	0.241579	9.26306e-07	0.236453	1.6283e-06		1.14184	2.69869e-06	0.512102	7.55432e-07	0.348403	5.81532e-07	0.241579	1.03395e-06		0.348405	6.76221e-07
8	F8 JNdi1	1080	7.08	0.055	0.72051	4.88754e-05	3.28724e-06	1.94484e-07	-3.73673e-07	1.33632e-07	6.32017e-05	1.35652e-06		1.14182	1.17143e-06	0.512098	3.57378e-07	0.348403	2.21483e-07	0.241577	4.24038e-07	0.236448	1.01946e-06		1.14182	1.60229e-06	0.512095	4.8096e-07	0.348401	3.63604e-07	0.241578	6.07651e-07	0.236448	1.01946e-06		1.14183	1.69142e-06	0.5121	4.64931e-07	0.348403	3.69109e-07	0.241576	5.87538e-07		0.348405	3.75163e-07
8	F9 JNdi1	1080	4.46	0.055	0.722821	4.51434e-05	4.9369e-06	2.03445e-07	6.97775e-07	2.07706e-07	3.54862e-05	4.1636e-07		1.14183	1.49278e-06	0.512099	4.42177e-07	0.348403	2.91034e-07	0.241579	5.54603e-07	0.236452	1.31876e-06		1.14183	2.12093e-06	0.512097	6.0418e-07	0.348401	5.02311e-07	0.241579	7.58829e-07	0.236452	1.31876e-06		1.14183	2.09784e-06	0.512101	6.21407e-07	0.348402	4.98845e-07	0.241579	8.08723e-07		0.348404	4.91657e-07
8	F10 JNdi1	810	5.17	0.167	0.72225	0.000133918	5.44325e-06	2.47863e-07	6.85067e-07	2.4792e-07	4.24091e-05	1.64669e-06		1.14182	1.60406e-06	0.512097	4.52423e-07	0.348403	3.04835e-07	0.241577	5.72098e-07	0.236446	1.37456e-06		1.14182	2.36681e-06	0.512095	6.39587e-07	0.348402	5.08486e-07	0.241576	8.22126e-07	0.236446	1.37456e-06		1.14182	2.16612e-06	0.512099	6.09513e-07	0.348402	5.14389e-07	0.241578	7.93682e-07		0.348404	5.39501e-07
10	F1 JNdi1	1050	4.51	0.091	0.722735	0.000101051	5.18538e-06	2.1356e-07	1.085e-06	2.35797e-07	3.87332e-05	1.25591e-06		1.14183	1.53682e-06	0.512099	4.42104e-07	0.348403	2.87092e-07	0.241579	5.68752e-07	0.236453	1.39132e-06		1.14183	2.16003e-06	0.512097	6.13424e-07	0.348401	4.73144e-07	0.241579	7.53937e-07	0.236453	1.39132e-06		1.14183	2.18777e-06	0.512101	6.04789e-07	0.348402	4.83254e-07	0.241579	8.46742e-07		0.348404	5.08332e-07
10	F2 JNdi1	1080	4.77	0.105	0.722205	9.6196e-05	3.36963e-06	1.81488e-07	4.04116e-07	1.83037e-07	3.6615e-05	1.07038e-06		1.14182	1.37847e-06	0.512097	4.12861e-07	0.348403	2.71486e-07	0.241577	5.03638e-07	0.236446	1.26389e-06		1.14183	1.92444e-06	0.512095	5.44068e-07	0.348401	4.43025e-07	0.241577	7.15949e-07	0.236446	1.26389e-06		1.14182	1.97536e-06	0.5121	5.85121e-07	0.348403	4.55371e-07	0.241577	7.07946e-07		0.348406	4.67622e-07
10	F4 JNdi1	1080	4.71	0.074	0.721392	6.4893e-05	3.15801e-06	2.00845e-07	7.10242e-08	1.87924e-07	4.15537e-05	1.00621e-06		1.14182	1.41842e-06	0.512097	4.22092e-07	0.348403	2.71527e-07	0.241576	5.16638e-07	0.236445	1.24377e-06		1.14182	1.94254e-06	0.512094	5.5226e-07	0.348402	4.53626e-07	0.241576	7.18528e-07	0.236445	1.24377e-06		1.14182	2.06702e-06	0.512099	5.92616e-07	0.348403	4.5486e-07	0.241576	7.42349e-07		0.348404	4.88431e-07
10	F5 JNdi1	1080	7.31	0.105	0.722816	0.000106606	2.6037e-06	1.29817e-07	3.78655e-07	1.36796e-07	2.74616e-05	9.75873e-07		1.14182	1.12232e-06	0.512097	3.36964e-07	0.348403	2.15487e-07	0.241576	4.07714e-07	0.236444	9.65772e-07		1.14182	1.61203e-06	0.512095	4.58601e-07	0.348402	3.68661e-07	0.241576	5.70259e-07	0.236444	9.65772e-07		1.14182	1.55722e-06	0.5121	4.4069e-07	0.348403	3.68129e-07	0.241576	5.83085e-07		0.348405	3.58495e-07
10	F6 JNdi1	1080	6.48	0.084	0.721352	7.61864e-05	3.44021e-06	1.53132e-07	2.63165e-08	1.34893e-07	4.40037e-05	1.29173e-06		1.14182	1.21209e-06	0.512097	3.64523e-07	0.348403	2.2386e-07	0.241577	4.2837e-07	0.236446	1.07313e-06		1.14182	1.74726e-06	0.512095	4.97747e-07	0.348401	3.78369e-07	0.241577	6.14728e-07	0.236446	1.07313e-06		1.14182	1.67474e-06	0.512099	5.02846e-07	0.348403	3.782e-07	0.241577	5.97049e-07		0.348405	3.73937e-07
10	F8 JNdi1	960	4.47	0.143	0.722318	0.000130265	5.39733e-06	2.64589e-07	2.85989e-07	2.13787e-07	4.05538e-05	1.614e-06		1.14182	1.63174e-06	0.512098	4.50045e-07	0.348403	3.04636e-07	0.241578	6.01589e-07	0.236448	1.41165e-06		1.14182	2.31545e-06	0.512096	6.26984e-07	0.348401	4.67721e-07	0.241578	8.35624e-07	0.236448	1.41165e-06		1.14183	2.29999e-06	0.5121	6.16002e-07	0.348402	4.95363e-07	0.241577	8.63942e-07		0.348405	5.70488e-07
10	F9 JNdi1	960	6.08	0.142	0.722877	0.000133004	4.00437e-06	1.65216e-07	5.55843e-07	1.60898e-07	3.27711e-05	1.15511e-06		1.14182	1.35211e-06	0.512098	3.97945e-07	0.348403	2.54961e-07	0.241577	4.69016e-07	0.236448	1.13258e-06		1.14182	1.94938e-06	0.512095	5.21596e-07	0.3484	4.26805e-07	0.241578	6.47226e-07	0.236448	1.13258e-06		1.14182	1.87478e-06	0.5121	5.54807e-07	0.348402	4.36519e-07	0.241577	6.7841e-07		0.348405	4.03387e-07
10	F10 JNdi1	1080	6.35	0.101	0.721481	8.99284e-05	5.54858e-06	1.87531e-07	1.70686e-07	1.35193e-07	4.52973e-05	1.38804e-06		1.14182	1.2283e-06	0.512098	3.61541e-07	0.348403	2.30758e-07	0.241577	4.31917e-07	0.236446	1.10364e-06		1.14182	1.76223e-06	0.512095	4.97818e-07	0.348401	3.75508e-07	0.241577	6.33288e-07	0.236446	1.10364e-06		1.14182	1.71219e-06	0.5121	4.91281e-07	0.348403	3.91806e-07	0.241576	5.87262e-07		0.348405	3.94641e-07
11	F1 JNdi1	840	4.3	0.153	0.722614	0.000140023	3.25953e-06	2.5128e-07	3.62162e-07	2.25603e-07	3.58652e-05	1.65613e-06		1.14182	1.72533e-06	0.512098	5.1146e-07	0.348403	3.21551e-07	0.241577	6.17554e-07	0.236448	1.40855e-06		1.14182	2.43966e-06	0.512095	6.84666e-07	0.348401	5.39623e-07	0.241579	8.39924e-07	0.236448	1.40855e-06		1.14183	2.42752e-06	0.512101	6.92379e-07	0.348403	5.15064e-07	0.241575	8.90879e-07		0.348405	5.79682e-07
11	F2 JNdi1	990	3.63	0.114	0.723067	0.000109836	2.71481e-06	2.82323e-07	1.32895e-06	5.29633e-07	3.09008e-05	1.04603e-06		1.14182	1.73593e-06	0.512097	5.0959e-07	0.348403	3.19154e-07	0.241577	6.45585e-07	0.236447	1.65016e-06		1.14182	2.45284e-06	0.512095	6.90548e-07	0.348401	5.39727e-07	0.241576	9.32309e-07	0.236447	1.65016e-06		1.14182	2.4544e-06	0.5121	7.16931e-07	0.348403	5.30487e-07	0.241578	8.89848e-07		0.348405	5.54374e-07
11	F5 JNdi1	1080	5.92	0.146	0.723182	0.000143368	2.61199e-06	1.56419e-07	7.7312e-07	1.73081e-07	2.67603e-05	1.00284e-06		1.14182	1.27278e-06	0.512097	3.77388e-07	0.348403	2.36649e-07	0.241576	4.44938e-07	0.236445	1.11801e-06		1.14182	1.79466e-06	0.512095	5.26565e-07	0.348401	4.03433e-07	0.241577	6.32182e-07	0.236445	1.11801e-06		1.14182	1.80614e-06	0.512099	5.1368e-07	0.348403	3.9827e-07	0.241576	6.26525e-07		0.348405	3.99245e-07

## Sheet: Static JNdi1 Extended runs
Multi-static and static Nd isotope ratios for JNdi1 extended runs
														Multi-static											Static 1									Static 2											Static 3
Session	Name	Number of cycles	Mean 142Nd signal intensity (V)	Mean fractionation rate (ppm/s)	146Nd/144Nd	2SE	140Ce/146Nd	2SE	147Sm/144Nd	2SE	141Pr/144Nd	2SE		142Nd/144Nd	2SE	143Nd/144Nd	2SE	145Nd/144Nd	2SE	148Nd/144Nd	2SE	150Nd/144Nd	2SE		142Nd/144Nd	2SE	143Nd/144Nd	2SE	145Nd/144Nd	2SE	148Nd/144Nd	2SE		142Nd/144Nd	2SE	143Nd/144Nd	2SE	145Nd/144Nd	2SE	148Nd/144Nd	2SE	150Nd/144Nd	2SE		142Nd/144Nd	2SE	143Nd/144Nd	2SE	145Nd/144Nd
1	F2 JNdi1	1080	7.5	0.091	0.721915	8.92888e-05	3.40664e-06	1.45495e-07	1.26879e-06	8.66073e-07	4.32563e-05	1.33443e-06		1.14185	1.72941e-06	0.512103	6.46299e-07	0.348403	3.25315e-07	0.241579	4.97927e-07	0.236441	1.12654e-06		1.1418	2.79466e-06	0.512088	1.01093e-06	0.348404	6.23021e-07	0.241582	8.09962e-07		1.14189	2.7128e-06	0.512121	1.12982e-06	0.348405	1.12982e-06	0.241572	8.47976e-07	0.236441	1.12654e-06		1.14186	2.68394e-06	0.512097	1.04217e-06	0.348403
1	F4 JNdi1	1080	7.75	0.054	0.721705	4.61259e-05	5.28358e-06	2.98068e-07	8.68212e-07	1.56296e-07	4.8607e-05	1.4514e-06		1.14185	1.68644e-06	0.512103	6.28104e-07	0.348403	3.11085e-07	0.24158	5.00533e-07	0.236444	9.86874e-07		1.1418	2.69387e-06	0.512089	9.97976e-07	0.348405	6.34686e-07	0.241585	7.89349e-07		1.14189	2.71902e-06	0.51212	1.0312e-06	0.348404	1.0312e-06	0.241571	7.58641e-07	0.236444	9.86874e-07		1.14186	2.73339e-06	0.512099	1.04351e-06	0.348403
1	F5 JNdi1	1080	4.46	0.098	0.72281	7.12057e-05	3.78355e-06	2.13227e-07	8.87062e-07	2.32667e-07	3.45466e-05	7.35246e-07		1.14185	2.03012e-06	0.512104	7.94685e-07	0.348402	4.23812e-07	0.24158	6.13355e-07	0.236444	1.34725e-06		1.14181	3.59524e-06	0.512092	1.35174e-06	0.348401	8.01102e-07	0.241579	1.04603e-06		1.14189	3.5041e-06	0.512126	1.37989e-06	0.348403	1.37989e-06	0.241575	1.03294e-06	0.236444	1.34725e-06		1.14187	3.6879e-06	0.512096	1.37781e-06	0.348403
1	F7 JNdi1	1050	7.19	0.05	0.721641	4.81889e-05	3.28079e-06	1.16481e-07	1.39246e-06	1.21236e-06	3.95228e-05	5.80642e-07		1.14185	1.67941e-06	0.512103	6.47907e-07	0.348403	3.33403e-07	0.241581	5.3656e-07	0.236445	1.17561e-06		1.1418	2.80016e-06	0.512091	1.08098e-06	0.348406	6.22116e-07	0.241584	8.4265e-07		1.14188	2.75722e-06	0.512118	1.22174e-06	0.348404	1.22174e-06	0.241572	8.66731e-07	0.236445	1.17561e-06		1.14186	2.76675e-06	0.512097	1.05462e-06	0.348401
1	F8 JNdi1	1050	7.4	0.073	0.721354	6.26857e-05	4.12657e-06	1.5156e-07	2.00381e-06	2.9279e-06	4.75883e-05	1.03356e-06		1.14186	1.85775e-06	0.512104	6.84945e-07	0.348403	3.3978e-07	0.241579	5.43131e-07	0.23644	1.19266e-06		1.1418	2.98503e-06	0.512088	1.18155e-06	0.348406	6.4031e-07	0.24158	8.7642e-07		1.14189	3.0014e-06	0.512122	1.17445e-06	0.348404	1.17445e-06	0.241572	9.31623e-07	0.23644	1.19266e-06		1.14188	2.88445e-06	0.5121	1.05595e-06	0.348401
2	F18 JNdi1	1050	7.01	0.049	0.721602	4.36212e-05	2.81416e-06	1.35126e-07	5.53185e-07	1.47545e-07	3.95155e-05	5.65454e-07		1.14185	1.66524e-06	0.512102	6.40521e-07	0.348402	3.24199e-07	0.241578	4.82909e-07	0.236443	1.13729e-06		1.1418	2.91271e-06	0.512092	1.04371e-06	0.348403	6.25123e-07	0.241582	8.00616e-07		1.14188	2.82804e-06	0.512119	1.09671e-06	0.348406	1.09671e-06	0.241573	8.00153e-07	0.236443	1.13729e-06		1.14184	2.86447e-06	0.512092	1.09248e-06	0.348401
2	F19 JNdi1	780	6.01	0.061	0.721998	5.21751e-05	2.988e-06	2.00549e-07	9.56685e-07	1.82663e-07	3.92234e-05	5.78717e-07		1.14185	2.0325e-06	0.512102	8.24735e-07	0.348402	4.28892e-07	0.24158	6.12537e-07	0.236446	1.30809e-06		1.14181	3.4574e-06	0.512092	1.35855e-06	0.348405	8.08637e-07	0.241584	9.77126e-07		1.14188	3.54008e-06	0.51212	1.40979e-06	0.348405	1.40979e-06	0.241573	9.69858e-07	0.236446	1.30809e-06		1.14186	3.56487e-06	0.512095	1.54575e-06	0.3484
2	F1 JNdi1	1080	6.3	0.073	0.721805	6.80074e-05	4.71896e-06	2.2424e-07	1.1547e-06	1.44326e-06	4.60025e-05	1.28039e-06		1.14185	1.90087e-06	0.512103	7.50461e-07	0.348402	3.81602e-07	0.241577	5.45031e-07	0.236439	1.27049e-06		1.1418	2.97768e-06	0.512091	1.13282e-06	0.348401	6.83529e-07	0.241578	9.09644e-07		1.1419	3.10927e-06	0.512122	1.29111e-06	0.348406	1.29111e-06	0.241573	9.4643e-07	0.236439	1.27049e-06		1.14184	3.2464e-06	0.51209	1.25919e-06	0.348403
2	F3 JNdi1	1080	6.18	0.056	0.721004	4.77626e-05	2.98549e-06	1.49847e-07	4.47504e-07	1.61195e-07	4.96646e-05	8.59653e-07		1.14185	1.82955e-06	0.512102	6.89962e-07	0.348403	3.49044e-07	0.241578	5.18084e-07	0.236438	1.13523e-06		1.14179	3.0622e-06	0.512088	1.10879e-06	0.348404	6.98648e-07	0.24158	7.99038e-07		1.14188	3.0201e-06	0.512121	1.19144e-06	0.348404	1.19144e-06	0.241571	8.47026e-07	0.236438	1.13523e-06		1.14186	2.93895e-06	0.512095	1.12222e-06	0.348404
3	F1 JNdi1	1080	7	0.052	0.722432	4.4261e-05	1.85529e-06	1.39145e-07	8.95062e-07	1.52916e-07	3.25981e-05	4.3684e-07		1.14185	1.59711e-06	0.512103	6.39202e-07	0.348402	3.35183e-07	0.241581	4.75622e-07	0.236452	1.07494e-06		1.14183	2.85295e-06	0.512096	1.05462e-06	0.348402	6.47551e-07	0.241581	7.80343e-07		1.14187	2.82218e-06	0.512121	1.12038e-06	0.348404	1.12038e-06	0.241577	7.93031e-07	0.236452	1.07494e-06		1.14187	2.90272e-06	0.512098	1.10276e-06	0.3484
3	F2 JNdi1	1080	5.89	0.09	0.721617	8.01499e-05	4.0046e-06	1.57295e-07	5.52601e-07	1.75669e-07	4.39695e-05	1.15882e-06		1.14185	1.79783e-06	0.512101	6.75394e-07	0.348402	3.55796e-07	0.241579	5.34819e-07	0.236441	1.18801e-06		1.1418	3.07374e-06	0.512088	1.15827e-06	0.348402	7.03125e-07	0.24158	8.64512e-07		1.14187	3.15309e-06	0.512117	1.16519e-06	0.348403	1.16519e-06	0.241572	8.84556e-07	0.236441	1.18801e-06		1.14186	3.1039e-06	0.512097	1.19249e-06	0.348403
3	F5 JNdi1	1080	5.91	0.087	0.72231	8.0442e-05	3.82316e-06	1.52631e-07	1.15708e-06	1.61646e-07	3.66074e-05	8.11066e-07		1.14185	1.80156e-06	0.512102	6.84277e-07	0.348402	3.61266e-07	0.241583	5.61955e-07	0.236447	1.18643e-06		1.14181	3.02956e-06	0.512087	1.15734e-06	0.348404	7.34186e-07	0.241584	8.59246e-07		1.14187	3.16657e-06	0.512116	1.20399e-06	0.3484	1.20399e-06	0.241573	8.77056e-07	0.236447	1.18643e-06		1.14189	3.04123e-06	0.512108	1.2048e-06	0.348402
3	F6 JNdi1	1080	6.05	0.048	0.720581	4.11747e-05	3.36871e-06	1.44487e-07	2.44939e-07	1.51411e-07	5.13921e-05	8.75081e-07		1.14184	1.8086e-06	0.5121	7.09842e-07	0.348402	3.41691e-07	0.241579	5.39103e-07	0.236439	1.14037e-06		1.1418	3.20688e-06	0.512086	1.23623e-06	0.348402	6.87934e-07	0.241581	8.54519e-07		1.14187	3.06496e-06	0.512121	1.16504e-06	0.348403	1.16504e-06	0.24157	8.79901e-07	0.236439	1.14037e-06		1.14186	3.03184e-06	0.512096	1.17661e-06	0.348403
3	F8 JNdi1	1080	4.83	0.085	0.721807	7.77772e-05	1.4221e-05	7.78017e-07	6.96534e-05	1.12527e-06	3.88357e-05	1.21371e-06		1.14185	2.08515e-06	0.512101	7.99704e-07	0.348402	4.06687e-07	0.241579	6.31946e-07	0.236437	1.28041e-06		1.14179	3.49068e-06	0.512085	1.31653e-06	0.348403	7.69682e-07	0.241584	9.29075e-07		1.14189	3.39871e-06	0.512124	1.27094e-06	0.348403	1.27094e-06	0.241568	9.71078e-07	0.236437	1.28041e-06		1.14186	3.45471e-06	0.512096	1.31361e-06	0.348403
4	F5 JNdi1	960	4.84	0.093	0.723214	7.92872e-05	3.64902e-06	2.08186e-07	1.33988e-06	2.29379e-07	2.97655e-05	6.53893e-07		1.14184	2.28938e-06	0.512099	8.92907e-07	0.348402	4.27146e-07	0.241581	6.73392e-07	0.236441	1.37263e-06		1.14177	3.7517e-06	0.51208	1.41337e-06	0.348399	8.48115e-07	0.241589	1.00299e-06		1.14188	3.70547e-06	0.512125	1.38763e-06	0.348403	1.38763e-06	0.241569	1.02182e-06	0.236441	1.37263e-06		1.14186	3.65502e-06	0.512095	1.42298e-06	0.348407
4	F6 JNdi1	1080	4.83	0.073	0.721777	6.35122e-05	4.1211e-06	1.96743e-07	6.44614e-07	1.79462e-07	4.21119e-05	1.0147e-06		1.14185	1.98192e-06	0.512101	7.38631e-07	0.348402	4.00703e-07	0.241579	6.01696e-07	0.236438	1.31368e-06		1.1418	3.44258e-06	0.512084	1.35041e-06	0.348402	7.93199e-07	0.241579	9.32532e-07		1.14188	3.51133e-06	0.512117	1.25049e-06	0.348401	1.25049e-06	0.241572	9.9084e-07	0.236438	1.31368e-06		1.14187	3.34031e-06	0.512102	1.25563e-06	0.348405
4	F8 JNdi1	1080	1.42	0.091	0.722577	8.41003e-05	3.1505e-06	2.21946e-07	8.15477e-07	2.51813e-07	2.635e-05	6.15319e-07		1.14185	2.1655e-06	0.512101	8.36344e-07	0.348402	4.29856e-07	0.24158	6.46327e-07	0.23644	1.428e-06		1.14179	3.74423e-06	0.512085	1.48908e-06	0.348403	8.79284e-07	0.241582	1.06162e-06		1.14188	3.79872e-06	0.512122	1.452e-06	0.348402	1.452e-06	0.241572	1.07145e-06	0.23644	1.428e-06		1.14187	3.79238e-06	0.5121	1.41835e-06	0.348402
5	F3 JNdi1	1050	7.77	0.125	0.72209	0.000123792	2.64138e-06	1.19768e-07	7.60841e-08	1.34014e-07	3.65876e-05	1.32958e-06		1.14184	1.92273e-06	0.512099	7.22161e-07	0.348403	3.28398e-07	0.241582	5.35866e-07	0.236439	1.06922e-06		1.14179	3.08306e-06	0.512078	1.0861e-06	0.348404	6.14584e-07	0.241583	7.87578e-07		1.14186	2.84518e-06	0.512119	1.07834e-06	0.348398	1.07834e-06	0.241571	7.7853e-07	0.236439	1.06922e-06		1.14189	2.85467e-06	0.512107	1.00344e-06	0.348406
5	F5 JNdi1	1020	5.07	0.119	0.722117	0.000110077	3.97194e-06	2.0938e-07	3.72706e-07	1.73776e-07	3.97349e-05	1.31165e-06		1.14184	2.19961e-06	0.512099	8.42779e-07	0.348403	4.05343e-07	0.241583	6.38403e-07	0.23644	1.23656e-06		1.14179	3.32044e-06	0.512077	1.28976e-06	0.348403	8.06158e-07	0.241582	9.6007e-07		1.14187	3.39327e-06	0.51212	1.27659e-06	0.348397	1.27659e-06	0.241572	9.53456e-07	0.23644	1.23656e-06		1.1419	3.46508e-06	0.51211	1.32808e-06	0.348406
5	F7 JNdi1	1080	4.25	0.077	0.721419	6.17704e-05	2.68159e-06	2.07755e-07	-2.11425e-07	2.05817e-07	4.39361e-05	8.94747e-07		1.14184	2.35345e-06	0.512099	8.88165e-07	0.348402	4.3648e-07	0.241583	6.7686e-07	0.236443	1.30913e-06		1.14179	3.79893e-06	0.512076	1.40899e-06	0.348402	8.55476e-07	0.241583	1.03457e-06		1.14187	3.48912e-06	0.51212	1.35667e-06	0.348395	1.35667e-06	0.241572	1.03064e-06	0.236443	1.30913e-06		1.14191	3.82931e-06	0.512111	1.45098e-06	0.348406
5	F8 JNdi1	840	4.52	0.094	0.722072	9.45474e-05	3.04572e-06	2.2656e-07	1.30713e-07	2.21462e-07	0	0		1.14185	2.73326e-06	0.512099	1.03407e-06	0.348402	5.02008e-07	0.241584	7.82203e-07	0.236441	1.57662e-06		1.1418	4.12034e-06	0.512074	1.50855e-06	0.348403	9.47534e-07	0.241583	1.15897e-06		1.14187	3.91655e-06	0.512121	1.55454e-06	0.348394	1.55454e-06	0.241571	1.13767e-06	0.236441	1.57662e-06		1.14192	4.21507e-06	0.512116	1.56932e-06	0.348408
6	F1 JNdi1	960	5.95	0.141	0.722352	0.000126341	4.98133e-06	2.01007e-07	8.4842e-07	2.01325e-07	3.70647e-05	1.47029e-06		1.14185	2.11532e-06	0.5121	8.36657e-07	0.348402	3.93238e-07	0.241582	6.41815e-07	0.236442	1.26959e-06		1.1418	3.42407e-06	0.512078	1.26639e-06	0.348402	7.48699e-07	0.241582	9.75207e-07		1.14187	3.28255e-06	0.512121	1.27269e-06	0.348397	1.27269e-06	0.241571	9.42544e-07	0.236442	1.26959e-06		1.1419	3.31649e-06	0.51211	1.28229e-06	0.348406
6	F2 JNdi1	1080	5.03	0.088	0.721717	7.51533e-05	2.93615e-06	1.83283e-07	3.4877e-07	1.81463e-07	4.0243e-05	1.19185e-06		1.14185	2.3424e-06	0.512099	8.89083e-07	0.348402	4.26032e-07	0.241584	6.60505e-07	0.236442	1.2739e-06		1.1418	3.36727e-06	0.512073	1.31095e-06	0.348403	7.41636e-07	0.241583	9.1152e-07		1.14187	3.32938e-06	0.512118	1.26555e-06	0.348393	1.26555e-06	0.241571	9.56218e-07	0.236442	1.2739e-06		1.14193	3.3728e-06	0.512118	1.30399e-06	0.348408
6	F3 JNdi1	1080	4.32	0.066	0.722172	6.14318e-05	4.58627e-06	2.30462e-07	8.60422e-07	2.34731e-07	3.95189e-05	8.89336e-07		1.14185	2.28581e-06	0.512101	8.81818e-07	0.348402	4.49702e-07	0.241583	7.03736e-07	0.236443	1.41109e-06		1.14181	3.73258e-06	0.512077	1.3908e-06	0.348402	8.11556e-07	0.241582	1.05095e-06		1.14187	3.49605e-06	0.512121	1.34568e-06	0.348394	1.34568e-06	0.241572	1.08209e-06	0.236443	1.41109e-06		1.14191	3.75301e-06	0.512114	1.35963e-06	0.348408
6	F4 JNdi1	1080	4.53	0.048	0.722604	4.109e-05	4.32845e-06	2.05306e-07	9.19487e-07	2.19974e-07	3.08815e-05	3.85113e-07		1.14185	2.41368e-06	0.512101	9.08368e-07	0.348402	4.5859e-07	0.241585	6.87168e-07	0.236444	1.36504e-06		1.1418	3.74199e-06	0.512074	1.41422e-06	0.348401	8.49419e-07	0.241583	1.03776e-06		1.14188	3.6761e-06	0.512122	1.36731e-06	0.348393	1.36731e-06	0.241574	1.00528e-06	0.236444	1.36504e-06		1.14193	3.65021e-06	0.512116	1.3708e-06	0.34841
6	F9 JNdi1	1080	5.71	0.084	0.722553	7.62114e-05	3.2065e-06	1.58792e-07	5.11238e-07	1.63788e-07	3.62898e-05	8.26675e-07		1.14185	2.24357e-06	0.512101	8.48975e-07	0.348402	3.96776e-07	0.241585	6.27274e-07	0.236445	1.1766e-06		1.1418	3.1559e-06	0.512076	1.16577e-06	0.348404	7.11706e-07	0.241586	8.67981e-07		1.14188	3.15384e-06	0.512122	1.20546e-06	0.348394	1.20546e-06	0.241572	8.53584e-07	0.236445	1.1766e-06		1.14192	3.3091e-06	0.512116	1.25596e-06	0.348407
7	F3 JNdi1	1080	4.71	0.089	0.723167	7.77402e-05	6.00996e-06	2.6484e-07	1.39892e-06	2.24786e-07	3.18496e-05	6.50884e-07		1.14185	2.45404e-06	0.512101	9.52944e-07	0.348402	4.48254e-07	0.241585	6.89312e-07	0.236446	1.35915e-06		1.1418	3.63655e-06	0.512073	1.40912e-06	0.348402	8.05861e-07	0.241584	9.75603e-07		1.14187	3.70017e-06	0.512121	1.42393e-06	0.348392	1.42393e-06	0.241573	1.00796e-06	0.236446	1.35915e-06		1.14193	3.55659e-06	0.512121	1.37591e-06	0.348408
8	F1 JNdi1	1080	4.74	0.08	0.722701	7.32704e-05	4.48646e-06	1.9672e-07	9.25426e-07	1.79804e-07	3.59656e-05	7.31755e-07		1.14186	2.87192e-06	0.512101	1.07643e-06	0.348402	4.87975e-07	0.241589	7.42614e-07	0.236447	1.34037e-06		1.1418	3.56117e-06	0.512065	1.29926e-06	0.348402	7.86293e-07	0.241586	9.4728e-07		1.14187	3.58309e-06	0.512121	1.34104e-06	0.348387	1.34104e-06	0.241573	9.64288e-07	0.236447	1.34037e-06		1.14197	3.35341e-06	0.512132	1.34118e-06	0.348412
8	F2 JNdi1	1500	8.72	0.069	0.723217	0.000109274	3.88373e-06	1.04186e-07	1.28413e-06	1.07264e-07	2.72978e-05	8.00428e-07		1.14185	1.85842e-06	0.512101	7.04349e-07	0.348402	3.15537e-07	0.241584	4.9667e-07	0.236443	9.35268e-07		1.1418	2.51224e-06	0.512074	9.62735e-07	0.348401	5.59009e-07	0.241582	6.87266e-07		1.14187	2.4911e-06	0.512121	9.41627e-07	0.348393	9.41627e-07	0.241573	7.08979e-07	0.236443	9.35268e-07		1.14193	2.61041e-06	0.512118	1.00459e-06	0.348409
8	F3 JNdi1	1620	5.93	0.048	0.72282	5.76638e-05	4.77711e-06	1.62573e-07	1.27379e-06	1.30392e-07	3.51371e-05	6.18085e-07		1.14186	2.00582e-06	0.512101	7.56189e-07	0.348402	3.4789e-07	0.241586	5.55961e-07	0.236445	9.44273e-07		1.14181	2.66514e-06	0.512072	9.84765e-07	0.348402	5.6967e-07	0.241583	7.05418e-07		1.14187	2.553e-06	0.512121	9.92203e-07	0.34839	9.92203e-07	0.241573	7.18015e-07	0.236445	9.44273e-07		1.14195	2.57765e-06	0.512124	9.94964e-07	0.348409
8	F4 JNdi1	1620	6.26	0.081	0.723365	0.000105251	2.78017e-06	1.55252e-07	1.10165e-06	1.65691e-07	2.99259e-05	8.54135e-07		1.14185	1.99179e-06	0.512099	7.62579e-07	0.348402	3.5606e-07	0.241585	5.32133e-07	0.236441	9.54176e-07		1.1418	2.60243e-06	0.512068	9.69715e-07	0.348402	6.02216e-07	0.241582	6.81844e-07		1.14187	2.54735e-06	0.51212	9.66272e-07	0.34839	9.66272e-07	0.241572	6.99162e-07	0.236441	9.54176e-07		1.14194	2.62585e-06	0.512123	1.02231e-06	0.34841
8	F5 JNdi1	1620	5.14	0.052	0.723112	6.35997e-05	3.53079e-06	1.8152e-07	1.41432e-06	1.78419e-07	3.15405e-05	5.53711e-07		1.14185	2.14397e-06	0.5121	8.16793e-07	0.348402	3.92526e-07	0.241587	5.90196e-07	0.236445	1.05875e-06		1.1418	2.91592e-06	0.512067	1.11772e-06	0.3484	6.17569e-07	0.241584	7.84446e-07		1.14188	2.8036e-06	0.512121	1.07698e-06	0.348389	1.07698e-06	0.241573	8.09617e-07	0.236445	1.05875e-06		1.14195	2.86509e-06	0.512125	1.07584e-06	0.348411
8	F6 JNdi1	690	6.32	0.147	0.722728	0.000148809	2.90411e-06	1.92651e-07	7.35143e-07	1.79347e-07	3.6595e-05	1.64751e-06		1.14185	3.16027e-06	0.512099	1.19174e-06	0.348402	5.41155e-07	0.241585	8.10791e-07	0.236442	1.35215e-06		1.14179	3.5379e-06	0.512066	1.38291e-06	0.348402	8.65951e-07	0.241584	1.0238e-06		1.14186	3.74125e-06	0.512119	1.40544e-06	0.348389	1.40544e-06	0.241571	1.02543e-06	0.236442	1.35215e-06		1.14195	3.79175e-06	0.512126	1.41463e-06	0.348409
8	F7 JNdi1	930	3.46	0.079	0.723077	7.26921e-05	6.53465e-06	1.16194e-06	9.56668e-07	2.7784e-07	3.47631e-05	7.74218e-07		1.14185	3.06629e-06	0.5121	1.19003e-06	0.348403	5.92156e-07	0.241587	8.80248e-07	0.236446	1.74871e-06		1.1418	4.43296e-06	0.512068	1.67733e-06	0.348403	1.01812e-06	0.241587	1.21427e-06		1.14187	4.67012e-06	0.512121	1.70205e-06	0.34839	1.70205e-06	0.241573	1.27151e-06	0.236446	1.74871e-06		1.14195	4.69883e-06	0.512125	1.79794e-06	0.34841
8	F8 JNdi1	1080	7.08	0.055	0.72051	4.88754e-05	3.28724e-06	1.94484e-07	-3.73673e-07	1.33632e-07	6.32017e-05	1.35652e-06		1.14184	1.80376e-06	0.5121	6.92443e-07	0.348403	3.30363e-07	0.241581	5.08782e-07	0.236443	1.03386e-06		1.14179	2.833e-06	0.512084	1.11649e-06	0.348404	6.62193e-07	0.241584	7.85203e-07		1.14187	2.92588e-06	0.512121	1.10584e-06	0.348402	1.10584e-06	0.241572	7.95273e-07	0.236443	1.03386e-06		1.14188	2.89319e-06	0.5121	1.07913e-06	0.348403
8	F9 JNdi1	1080	4.46	0.055	0.722821	4.51434e-05	4.9369e-06	2.03445e-07	6.97775e-07	2.07706e-07	3.54862e-05	4.1636e-07		1.14186	2.68236e-06	0.512101	1.01182e-06	0.348402	5.07988e-07	0.241587	7.38983e-07	0.236447	1.32431e-06		1.14181	3.77093e-06	0.512069	1.43859e-06	0.348401	8.03307e-07	0.241585	9.66582e-07		1.14187	3.65778e-06	0.512121	1.413e-06	0.348388	1.413e-06	0.241573	1.00608e-06	0.236447	1.32431e-06		1.14195	3.71883e-06	0.512126	1.42024e-06	0.348412
8	F10 JNdi1	810	5.17	0.167	0.72225	0.000133918	5.44325e-06	2.47863e-07	6.85067e-07	2.4792e-07	4.24091e-05	1.64669e-06		1.14185	2.97173e-06	0.512099	1.10408e-06	0.348402	5.46298e-07	0.241585	8.10925e-07	0.236443	1.42919e-06		1.1418	4.09782e-06	0.512069	1.53851e-06	0.348402	9.04215e-07	0.241583	1.07141e-06		1.14186	3.96983e-06	0.512118	1.40204e-06	0.348389	1.40204e-06	0.241571	1.07068e-06	0.236443	1.42919e-06		1.14194	3.7976e-06	0.512125	1.46672e-06	0.34841
10	F1 JNdi1	1050	4.51	0.091	0.722735	0.000101051	5.18538e-06	2.1356e-07	1.085e-06	2.35797e-07	3.87332e-05	1.25591e-06		1.14186	2.694e-06	0.512101	1.03287e-06	0.348402	4.92403e-07	0.241587	7.45494e-07	0.236446	1.45543e-06		1.14181	4.03137e-06	0.512071	1.52617e-06	0.348402	8.36513e-07	0.241583	1.04396e-06		1.14187	3.78468e-06	0.51212	1.45467e-06	0.34839	1.45467e-06	0.241574	1.06914e-06	0.236446	1.45543e-06		1.14194	3.88936e-06	0.512126	1.46071e-06	0.348409
10	F2 JNdi1	1080	4.77	0.105	0.722205	9.6196e-05	3.36963e-06	1.81488e-07	4.04116e-07	1.83037e-07	3.6615e-05	1.07038e-06		1.14185	3.04379e-06	0.512099	1.14171e-06	0.348403	5.06701e-07	0.241588	7.67322e-07	0.236441	1.26273e-06		1.14179	3.34502e-06	0.51206	1.22994e-06	0.348402	8.04344e-07	0.241585	9.24507e-07		1.14187	3.32686e-06	0.512121	1.32077e-06	0.348386	1.32077e-06	0.241571	9.48047e-07	0.236441	1.26273e-06		1.14198	3.3283e-06	0.512135	1.2853e-06	0.348412
10	F4 JNdi1	1080	4.71	0.074	0.721392	6.4893e-05	3.15801e-06	2.00845e-07	7.10242e-08	1.87924e-07	4.15537e-05	1.00621e-06		1.14185	2.91175e-06	0.512099	1.08101e-06	0.348402	4.92424e-07	0.241586	7.54353e-07	0.236442	1.29329e-06		1.14179	3.41191e-06	0.512062	1.29708e-06	0.348404	8.15132e-07	0.241584	9.72463e-07		1.14187	3.40365e-06	0.512121	1.34902e-06	0.348387	1.34902e-06	0.241571	9.65415e-07	0.236442	1.29329e-06		1.14196	3.58645e-06	0.512129	1.32358e-06	0.348411
10	F5 JNdi1	1080	7.31	0.105	0.722816	0.000106606	2.6037e-06	1.29817e-07	3.78655e-07	1.36796e-07	2.74616e-05	9.75873e-07		1.14185	2.6306e-06	0.5121	9.79918e-07	0.348403	4.1383e-07	0.241586	6.61233e-07	0.236441	1.01956e-06		1.14179	2.91578e-06	0.512065	1.11989e-06	0.348404	6.63695e-07	0.241585	7.91445e-07		1.14187	2.83174e-06	0.512121	1.05464e-06	0.348389	1.05464e-06	0.24157	7.63407e-07	0.236441	1.01956e-06		1.14196	2.79022e-06	0.512129	1.06953e-06	0.34841
10	F6 JNdi1	1080	6.48	0.084	0.721352	7.61864e-05	3.44021e-06	1.53132e-07	2.63165e-08	1.34893e-07	4.40037e-05	1.29173e-06		1.14185	3.15174e-06	0.512098	1.17999e-06	0.348403	4.9968e-07	0.241589	7.71647e-07	0.236441	1.05945e-06		1.14179	2.98409e-06	0.512056	1.12619e-06	0.348403	6.85509e-07	0.241585	8.28425e-07		1.14186	2.87648e-06	0.512121	1.15613e-06	0.348383	1.15613e-06	0.24157	8.19163e-07	0.236441	1.05945e-06		1.14199	3.02759e-06	0.512139	1.16914e-06	0.348414
10	F8 JNdi1	960	4.47	0.143	0.722318	0.000130265	5.39733e-06	2.64589e-07	2.85989e-07	2.13787e-07	4.05538e-05	1.614e-06		1.14184	2.86247e-06	0.512099	1.08831e-06	0.348402	5.25075e-07	0.241585	7.97605e-07	0.23644	1.44198e-06		1.14179	3.97092e-06	0.512067	1.4909e-06	0.348401	8.71296e-07	0.241582	1.04398e-06		1.14186	3.79615e-06	0.512119	1.41151e-06	0.348389	1.41151e-06	0.241572	1.1161e-06	0.23644	1.44198e-06		1.14194	3.74684e-06	0.512126	1.38847e-06	0.34841
10	F9 JNdi1	960	6.08	0.142	0.722877	0.000133004	4.00437e-06	1.65216e-07	5.55843e-07	1.60898e-07	3.27711e-05	1.15511e-06		1.14185	2.9359e-06	0.512099	1.12693e-06	0.348402	5.10469e-07	0.241587	7.54681e-07	0.236442	1.22675e-06		1.14179	3.6474e-06	0.512062	1.30356e-06	0.3484	8.04789e-07	0.241583	9.83359e-07		1.14186	3.25152e-06	0.512118	1.25518e-06	0.348385	1.25518e-06	0.241572	8.71863e-07	0.236442	1.22675e-06		1.14196	3.15973e-06	0.512133	1.21185e-06	0.348412
10	F10 JNdi1	1080	6.35	0.101	0.721481	8.99284e-05	5.54858e-06	1.87531e-07	1.70686e-07	1.35193e-07	4.52973e-05	1.38804e-06		1.14185	2.84145e-06	0.512099	1.07845e-06	0.348403	4.91303e-07	0.241586	7.11431e-07	0.23644	1.13512e-06		1.1418	3.09915e-06	0.512061	1.14424e-06	0.348401	6.7755e-07	0.241581	8.08622e-07		1.14186	2.90861e-06	0.512118	1.12321e-06	0.348385	1.12321e-06	0.241571	8.5345e-07	0.23644	1.13512e-06		1.14197	2.95185e-06	0.512135	1.14164e-06	0.348414
11	F1 JNdi1	840	4.3	0.153	0.722614	0.000140023	3.25953e-06	2.5128e-07	3.62162e-07	2.25603e-07	3.58652e-05	1.65613e-06		1.14184	2.71627e-06	0.512101	1.01636e-06	0.348402	4.94955e-07	0.241584	7.49367e-07	0.236445	1.58991e-06		1.1418	4.15886e-06	0.512077	1.56099e-06	0.348404	9.8209e-07	0.241586	1.15762e-06		1.14187	4.30509e-06	0.512122	1.62626e-06	0.348395	1.62626e-06	0.241573	1.1456e-06	0.236445	1.58991e-06		1.14191	4.23315e-06	0.512114	1.56582e-06	0.348406
11	F2 JNdi1	990	3.63	0.114	0.723067	0.000109836	2.71481e-06	2.82323e-07	1.32895e-06	5.29633e-07	3.09008e-05	1.04603e-06		1.14185	3.1093e-06	0.5121	1.13685e-06	0.348403	5.32941e-07	0.241587	8.71906e-07	0.236446	1.58298e-06		1.1418	4.27841e-06	0.512067	1.62129e-06	0.348403	9.91548e-07	0.241586	1.24038e-06		1.14187	4.20675e-06	0.512121	1.61752e-06	0.348391	1.61752e-06	0.241571	1.23324e-06	0.236446	1.58298e-06		1.14195	4.47989e-06	0.512126	1.61876e-06	0.34841
11	F5 JNdi1	1080	5.92	0.146	0.723182	0.000143368	2.61199e-06	1.56419e-07	7.7312e-07	1.73081e-07	2.67603e-05	1.00284e-06		1.14185	3.32411e-06	0.512099	1.24905e-06	0.348402	5.49839e-07	0.241589	7.99508e-07	0.236442	1.15343e-06		1.1418	3.19014e-06	0.512055	1.21021e-06	0.348402	7.24215e-07	0.241583	8.67588e-07		1.14185	3.20401e-06	0.512118	1.21914e-06	0.348381	1.21914e-06	0.241572	8.57241e-07	0.236442	1.15343e-06		1.142	3.1373e-06	0.512145	1.1654e-06	0.348415
[truncated: 9 more columns]

## Sheet: Dynamic JNdi1 Classic runs
Multi-dynamic and dynamic Nd isotope ratios for JNdi1 classic runs
														Multi-dynamic											Dynamic 1											Dynamic 2									Dynamic 3
Session	Name	Number of cycles	Mean 142Nd signal intensity (V)	Mean fractionation rate (ppm/s)	146Nd/144Nd	2SE	140Ce/146Nd	2SE	147Sm/144Nd	2SE	141Pr/144Nd	2SE		142Nd/144Nd	2SE	143Nd/144Nd	2SE	145Nd/144Nd	2SE	148Nd/144Nd	2SE	150Nd/144Nd	2SE		142Nd/144Nd	2SE	143Nd/144Nd	2SE	145Nd/144Nd	2SE	148Nd/144Nd	2SE	150Nd/144Nd	2SE		142Nd/144Nd	2SE	143Nd/144Nd	2SE	145Nd/144Nd	2SE	148Nd/144Nd	2SE		145Nd/144Nd	2SE
7	F4 750ng	540	6.61	0.068	0.720628	5.84218e-05	5.27304e-06	3.39018e-07	-3.97875e-07	2.61314e-07	5.59958e-05	1.56032e-06		1.14182	1.92238e-06	0.512098	5.58033e-07	0.348403	3.54716e-07	0.241577	6.5111e-07	0.236448	1.63239e-06		1.14182	2.58355e-06	0.512095	6.95032e-07	0.348402	5.94475e-07	0.241578	8.87463e-07	0.236448	1.63239e-06		1.14183	2.82782e-06	0.512101	7.87927e-07	0.348403	6.25985e-07	0.241575	9.32709e-07		0.348405	5.96602e-07
7	F5 750ng	540	4.29	0.136	0.721135	8.23268e-05	3.55323e-06	3.22164e-07	-4.24348e-07	2.93438e-07	4.80437e-05	1.55487e-06		1.14182	2.15197e-06	0.512099	6.43201e-07	0.348403	4.15875e-07	0.241577	7.57789e-07	0.236447	1.81858e-06		1.14182	3.11385e-06	0.512096	8.58202e-07	0.348401	7.12103e-07	0.241577	1.07543e-06	0.236447	1.81858e-06		1.14182	2.95452e-06	0.512102	8.86994e-07	0.348403	6.97825e-07	0.241576	1.06457e-06		0.348405	7.15307e-07
7	F6 750ng	540	5.67	0.095	0.720587	5.86979e-05	3.66459e-06	2.35666e-07	-6.14129e-07	2.20255e-07	5.6555e-05	1.51122e-06		1.14183	1.80529e-06	0.512098	5.60928e-07	0.348404	3.65263e-07	0.241577	6.7789e-07	0.236447	1.61856e-06		1.14182	2.54689e-06	0.512096	7.35042e-07	0.348401	6.02778e-07	0.241578	9.45151e-07	0.236447	1.61856e-06		1.14183	2.54005e-06	0.512101	7.65399e-07	0.348404	6.12624e-07	0.241576	9.66271e-07		0.348406	6.22529e-07
7	F7 750ng	540	2.61	0.089	0.720859	5.76187e-05	3.58333e-06	4.87947e-07	-9.69696e-07	4.87651e-07	5.55422e-05	1.40552e-06		1.14182	2.6843e-06	0.512096	7.867e-07	0.348403	4.98988e-07	0.241577	1.01628e-06	0.236448	2.46479e-06		1.14182	3.71823e-06	0.512094	1.10353e-06	0.348402	8.40979e-07	0.241578	1.4399e-06	0.236448	2.46479e-06		1.14182	3.8474e-06	0.512098	1.09117e-06	0.348402	8.63491e-07	0.241577	1.43455e-06		0.348404	8.81045e-07
7	F8 750ng	540	5.81	0.167	0.721511	0.000104328	3.75764e-06	2.41164e-07	3.13373e-07	2.54552e-07	4.44933e-05	1.50546e-06		1.14182	1.7789e-06	0.512097	5.70148e-07	0.348403	3.36926e-07	0.241578	6.62124e-07	0.23645	1.69114e-06		1.14183	2.4388e-06	0.512095	7.84244e-07	0.348401	5.54604e-07	0.241578	9.73263e-07	0.23645	1.69114e-06		1.14182	2.58472e-06	0.512099	7.69174e-07	0.348403	5.40634e-07	0.241578	8.98283e-07		0.348406	5.79079e-07
9	F10 Jndi 750ng	540	5.01	0.143	0.722541	9.14526e-05	3.57521e-06	2.43053e-07	8.2344e-07	2.46971e-07	3.46378e-05	9.15524e-07		1.14183	1.96505e-06	0.512098	6.04362e-07	0.348402	3.8392e-07	0.241578	6.99501e-07	0.236448	1.74595e-06		1.14183	2.89301e-06	0.512095	7.92315e-07	0.348401	6.36639e-07	0.241577	9.96197e-07	0.236448	1.74595e-06		1.14183	2.65375e-06	0.5121	8.62475e-07	0.348402	6.36783e-07	0.241578	9.81303e-07		0.348404	6.76623e-07
9	F11 Jndi 750ng	540	5.71	0.164	0.722896	0.000121599	3.5064e-06	2.49815e-07	9.24462e-07	2.28549e-07	2.89676e-05	8.55398e-07		1.14183	1.87915e-06	0.512098	5.57072e-07	0.348404	3.55462e-07	0.241578	6.73553e-07	0.236451	1.77627e-06		1.14183	2.66921e-06	0.512095	8.06398e-07	0.348402	5.85384e-07	0.241578	9.87599e-07	0.236451	1.77627e-06		1.14183	2.64853e-06	0.5121	6.94282e-07	0.348403	6.13017e-07	0.241578	9.16357e-07		0.348405	6.25762e-07
9	F7 Jndi 750ng	540	6.2	0.121	0.722546	6.6964e-05	4.97076e-06	2.94557e-07	3.17321e-07	2.12422e-07	3.72759e-05	8.03024e-07		1.14183	1.76078e-06	0.512099	5.36285e-07	0.348403	3.22209e-07	0.241579	5.88917e-07	0.23645	1.41424e-06		1.14183	2.37805e-06	0.512096	6.78215e-07	0.348401	5.0127e-07	0.241579	8.51371e-07	0.23645	1.41424e-06		1.14183	2.58466e-06	0.512102	7.36718e-07	0.348403	5.51549e-07	0.241578	8.11031e-07		0.348404	5.80025e-07
9	F8 Jndi 750ng	540	6.06	0.118	0.722462	6.12584e-05	3.53387e-06	2.39093e-07	3.39037e-07	2.24447e-07	3.66768e-05	7.7186e-07		1.14183	1.76248e-06	0.512099	5.57123e-07	0.348403	3.34583e-07	0.241578	6.38111e-07	0.236452	1.61015e-06		1.14183	2.48993e-06	0.512096	7.55219e-07	0.348401	5.52107e-07	0.241579	8.83348e-07	0.236452	1.61015e-06		1.14183	2.49362e-06	0.512102	7.4591e-07	0.348403	5.70852e-07	0.241578	9.20312e-07		0.348404	5.82141e-07
9	F9 Jndi 750ng	540	4.88	0.153	0.722767	0.000101285	3.20718e-06	2.82367e-07	1.50544e-07	2.5711e-07	3.53294e-05	1.07729e-06		1.14183	1.96394e-06	0.512098	5.90748e-07	0.348402	3.72522e-07	0.241579	7.1934e-07	0.23645	1.8249e-06		1.14183	2.77981e-06	0.512095	8.52227e-07	0.348401	6.39754e-07	0.241579	1.03131e-06	0.23645	1.8249e-06		1.14183	2.7776e-06	0.5121	7.61274e-07	0.348402	6.33829e-07	0.241578	1.00371e-06		0.348404	6.23071e-07

## Sheet: Static JNdi1 Classic runs
Multi-dynamic and dynamic Nd isotope ratios for JNdi1 classic runs
														Multi-static											Static 1									Static 2											Static 3
Session	Name	Number of cycles	Mean 142Nd signal intensity (V)	Mean fractionation rate (ppm/s)	146Nd/144Nd	2SE	140Ce/146Nd	2SE	147Sm/144Nd	2SE	141Pr/144Nd	2SE		142Nd/144Nd	2SE	143Nd/144Nd	2SE	145Nd/144Nd	2SE	148Nd/144Nd	2SE	150Nd/144Nd	2SE		142Nd/144Nd	2SE	143Nd/144Nd	2SE	145Nd/144Nd	2SE	148Nd/144Nd	2SE		142Nd/144Nd	2SE	143Nd/144Nd	2SE	145Nd/144Nd	2SE	148Nd/144Nd	2SE	150Nd/144Nd	2SE		142Nd/144Nd	2SE	143Nd/144Nd	2SE	145Nd/144Nd
7	F4 750ng	540	6.61	0.068	0.720628	5.84218e-05	5.27304e-06	3.39018e-07	-3.97875e-07	2.61314e-07	5.59958e-05	1.56032e-06		1.14185	3.69343e-06	0.512099	1.38083e-06	0.348403	6.05054e-07	0.241586	9.18718e-07	0.236443	1.6735e-06		1.14179	4.4906e-06	0.512067	1.63236e-06	0.348403	1.04006e-06	0.241584	1.22447e-06		1.14186	4.36817e-06	0.512119	1.8042e-06	0.34839	1.8042e-06	0.241573	1.16441e-06	0.236443	1.6735e-06		1.14195	4.60878e-06	0.512126	1.74857e-06	0.34841
7	F5 750ng	540	4.29	0.136	0.721135	8.23268e-05	3.55323e-06	3.22164e-07	-4.24348e-07	2.93438e-07	4.80437e-05	1.55487e-06		1.14185	3.73543e-06	0.512101	1.41558e-06	0.348402	6.81939e-07	0.241585	1.02079e-06	0.236444	1.89481e-06		1.1418	5.386e-06	0.512072	2.02253e-06	0.348403	1.21491e-06	0.241584	1.4177e-06		1.14187	5.14866e-06	0.512123	1.93854e-06	0.348393	1.93854e-06	0.241573	1.43836e-06	0.236444	1.89481e-06		1.14193	5.1783e-06	0.512123	1.96042e-06	0.348407
7	F6 750ng	540	5.67	0.095	0.720587	5.86979e-05	3.66459e-06	2.35666e-07	-6.14129e-07	2.20255e-07	5.6555e-05	1.51122e-06		1.14185	3.49206e-06	0.5121	1.30189e-06	0.348403	5.73071e-07	0.241586	9.20312e-07	0.236443	1.71495e-06		1.14179	4.51445e-06	0.51207	1.63882e-06	0.348404	1.00812e-06	0.241586	1.26221e-06		1.14187	4.44283e-06	0.512123	1.73806e-06	0.348394	1.73806e-06	0.241572	1.19938e-06	0.236443	1.71495e-06		1.14194	4.55168e-06	0.512121	1.70862e-06	0.348408
7	F7 750ng	540	2.61	0.089	0.720859	5.76187e-05	3.58333e-06	4.87947e-07	-9.69696e-07	4.87651e-07	5.55422e-05	1.40552e-06		1.14185	4.19743e-06	0.512098	1.62002e-06	0.348402	8.35395e-07	0.241585	1.23791e-06	0.236443	2.59336e-06		1.14179	6.3826e-06	0.512068	2.37661e-06	0.348402	1.53364e-06	0.241586	1.79916e-06		1.14188	6.87985e-06	0.512122	2.551e-06	0.348389	2.551e-06	0.241572	1.97323e-06	0.236443	2.59336e-06		1.14193	6.85376e-06	0.512118	2.55887e-06	0.348411
7	F8 750ng	540	5.81	0.167	0.721511	0.000104328	3.75764e-06	2.41164e-07	3.13373e-07	2.54552e-07	4.44933e-05	1.50546e-06		1.14184	3.29376e-06	0.512099	1.27924e-06	0.348403	5.75922e-07	0.241584	9.07562e-07	0.236442	1.71306e-06		1.1418	4.32093e-06	0.51207	1.7057e-06	0.348402	9.91862e-07	0.241581	1.19732e-06		1.14186	4.5032e-06	0.51212	1.79719e-06	0.348392	1.79719e-06	0.241571	1.30069e-06	0.236442	1.71306e-06		1.14193	4.56077e-06	0.512119	1.77875e-06	0.348409
9	F10 Jndi 750ng	540	5.01	0.143	0.722541	9.14526e-05	3.57521e-06	2.43053e-07	8.2344e-07	2.46971e-07	3.46378e-05	9.15524e-07		1.14186	3.75225e-06	0.5121	1.405e-06	0.348402	6.40263e-07	0.241587	1.01269e-06	0.236446	1.82915e-06		1.1418	4.85973e-06	0.512067	1.84875e-06	0.348403	1.02565e-06	0.241586	1.40392e-06		1.14187	4.98394e-06	0.512121	1.87856e-06	0.34839	1.87856e-06	0.241572	1.32778e-06	0.236446	1.82915e-06		1.14195	4.54954e-06	0.512126	1.73481e-06	0.348409
9	F11 Jndi 750ng	540	5.71	0.164	0.722896	0.000121599	3.5064e-06	2.49815e-07	9.24462e-07	2.28549e-07	2.89676e-05	8.55398e-07		1.14186	4.07299e-06	0.5121	1.51627e-06	0.348403	6.89689e-07	0.241589	1.03169e-06	0.236448	1.71839e-06		1.14181	4.62634e-06	0.512063	1.80774e-06	0.348403	9.908e-07	0.241584	1.29841e-06		1.14187	4.60571e-06	0.51212	1.65987e-06	0.348386	1.65987e-06	0.241574	1.33859e-06	0.236448	1.71839e-06		1.14198	4.48325e-06	0.512134	1.74478e-06	0.348413
9	F7 Jndi 750ng	540	6.2	0.121	0.722546	6.6964e-05	4.97076e-06	2.94557e-07	3.17321e-07	2.12422e-07	3.72759e-05	8.03024e-07		1.14185	3.13237e-06	0.512101	1.17724e-06	0.348403	5.17773e-07	0.241586	8.30422e-07	0.236448	1.54882e-06		1.1418	4.09805e-06	0.512075	1.57865e-06	0.348404	9.44793e-07	0.241587	1.16905e-06		1.14187	4.19788e-06	0.512122	1.63376e-06	0.348395	1.63376e-06	0.241574	1.15795e-06	0.236448	1.54882e-06		1.14193	4.28384e-06	0.512117	1.58113e-06	0.348407
9	F8 Jndi 750ng	540	6.06	0.118	0.722462	6.12584e-05	3.53387e-06	2.39093e-07	3.39037e-07	2.24447e-07	3.66768e-05	7.7186e-07		1.14186	4.01918e-06	0.512101	1.52209e-06	0.348402	6.54763e-07	0.241588	9.98264e-07	0.236448	1.66539e-06		1.1418	4.61736e-06	0.512063	1.59247e-06	0.348402	1.005e-06	0.241585	1.21458e-06		1.14187	4.31898e-06	0.512122	1.69618e-06	0.348387	1.69618e-06	0.241573	1.15803e-06	0.236448	1.66539e-06		1.14198	4.42026e-06	0.512134	1.71431e-06	0.348412
9	F9 Jndi 750ng	540	4.88	0.153	0.722767	0.000101285	3.20718e-06	2.82367e-07	1.50544e-07	2.5711e-07	3.53294e-05	1.07729e-06		1.14185	3.8667e-06	0.5121	1.45342e-06	0.348401	6.62934e-07	0.241588	1.04298e-06	0.236447	1.8009e-06		1.1418	5.21025e-06	0.512067	1.91892e-06	0.348402	1.09674e-06	0.241586	1.43146e-06		1.14187	4.56969e-06	0.512122	1.80519e-06	0.348388	1.80519e-06	0.241573	1.38278e-06	0.236447	1.8009e-06		1.14196	4.62198e-06	0.512128	1.95945e-06	0.348409
[truncated: 9 more columns]
